# Supplementary material for: Highly sensitive electrochemiluminescence detection of a prostate cancer biomarker
Source: Royal Society of Chemistry journal article supplement (doi:10.1039/c7tb01557g), 2017-01-01
Supplement: c7tb01557g1.pdf [file c7tb01557g1.pdf]

## Supplementary Information

**Title** Highly sensitive electrochemiluminescent detection of prostate cancer biomarker

*Arturo Juzgado, Alice Soldà, Adrian Ostric, Alejandro Criado,\* Giovanni Valenti,\* Stefania Rapino, Giamaica Conti, Giulio Fracasso, Francesco Paolucci,\* Maurizio Prato\**

### Reagents

Multiwalled carbon nanotubes were purchased from Nanoamor. Nitric acid (>69 %), sulfuric acid (95 – 97 %), sodium hydroxide ( $\geq 98$  %), 4-[(N-Boc)aminomethyl]aniline ( $\geq 97$  %), hydrochloric acid ( $\geq 37$  %), N,N-diisopropylethylamine (99.5 %), 1-hydroxybenzotriazole hydrate (HOBt,  $\geq 97$  %), sodium phosphate dibasic, sodium phosphate dibasic and all solvents (DMF, THF, EtOH, Et<sub>2</sub>O, MeOH, CH<sub>2</sub>Cl<sub>2</sub>) from Sigma Aldrich. Isopentyl nitrate (97 %, stab. with 0.2 % anhyd. sodium carbonate) from Alfa Aesar. N-(3-Dimethylaminopropyl)-N'-ethylcarbodiimide (EDC), 4-(dimethylamino)pyridine (DMAP) and trifluoroacetic acid (TFA) from Fluorochem. N-Hydroxysuccinimide (NHS,  $\geq 97\%$ ) and Kaiser Test kit from Fluka. Bis(2,2'-bipyridine)-[4-(4'-methyl-2,2'-bipyridin-4-yl)-aminobutyl] ruthenium(II) complex from Cyanagen. N-succinimidyl 3-maleimidopropionate and N-Boc-2,2'-(ethylenedioxy)diethylamine were synthesized as previously reported.<sup>[1]</sup>

---

<sup>1</sup> G. Pastorin, W. Wu, S. Wieckowski, J.-P. Briand, K. Kostarelos, M. Prato, A. Bianco *Chem. Commun.*, **2006**, 35, 1182.

## Instrumentation

TGA profiles were recorded on a TGA Q500 (TA instruments), under N<sub>2</sub>, by equilibrating at 100 °C for 20 min, and following a ramp at 10 °C/min up to 800 °C (approximately 1 mg of each compound). TEM measurements were performed on a TEM Philips EM208, using an accelerating voltage of 100kV. Samples were prepared by drop casting from dispersion onto a TEM grid (300 mesh, nickel, carbon only). SEM measurements were performed on a SEM of type JEOL JSM-6490LV.

## Preparation of f-MWCNT@mAb

### Synthesis of ox-MWCNTs

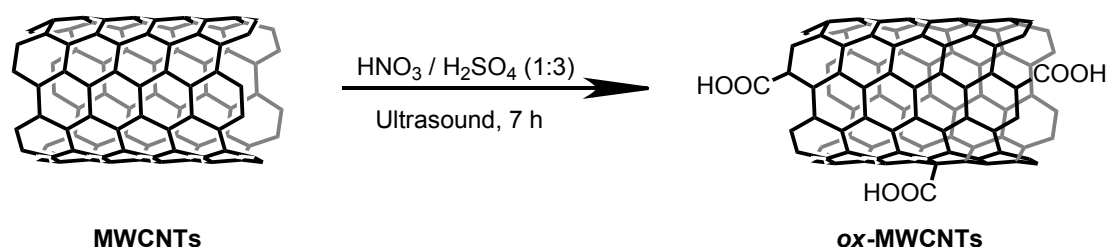

MWCNTs (200 mg) were sonicated in a mixture of nitric acid and sulfuric acid (48 mL) in a 1:3 ratio for 7 h at 10-30 °C. After sonication, the resulting mixture was poured onto distilled water (700 mL) and filtered on a teflon membrane (Millipore, JHWP, 0.45 µm). The black solid was then washed by redispersion and filtration in distilled water, in a 0.1 M solution of NaOH, distilled water, DMF and finally in THF. The ox-MWCNTs were recovered from the filter as a black solid (150 mg). The weight loss at 500 °C in TGA was 5.1 %, corresponding to a functionalization with carboxylic groups of 1142 µmol g<sup>-1</sup>.

## Synthesis of *f*-MWCNTs 1

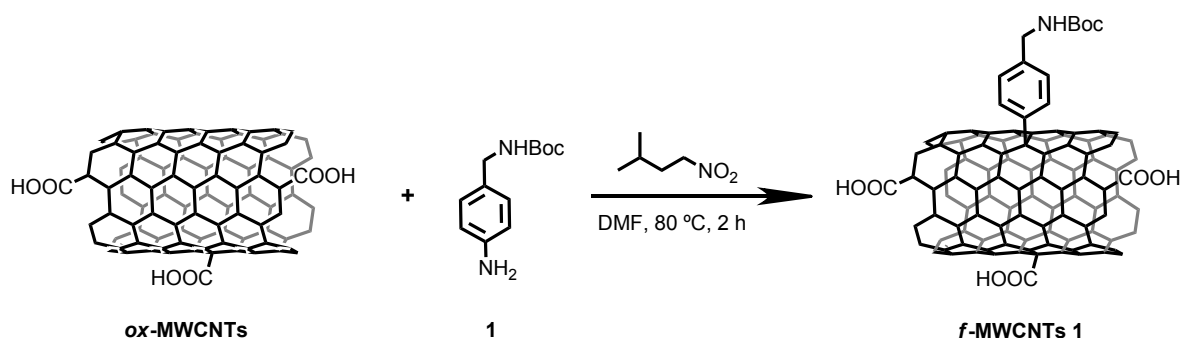

The *ox*-MWCNTs (30 mg) were dispersed in DMF (30 mL) by sonication for a couple of minutes. 4-[(N-Boc)aminomethyl]aniline (660 mg, 3 mmol) was added, followed by dropwise addition of isopentyl nitrite (1.45 mL, 10.8 mmol). The resulting suspension was heated up to 80 °C and stirred for 2 hours. Then, the mixture was filtered on a teflon membrane (Millipore, JHWP, 4.5  $\mu\text{m}$ ) and washed by redispersion and filtration using DMF, MeOH, distilled water, MeOH, AcOEt and finally, rinsed over the filter with Et<sub>2</sub>O. The *f*-MWCNTs **1** were recovered from the filter as a black solid (25 mg). The TGA profile showed a neat weight loss of 3.6 %, corresponding to a degree of functionalization of 176  $\mu\text{mol}$  of functional groups per gram of *f*-MWCNTs **1**.

## Synthesis of *f*-MWCNTs **2**

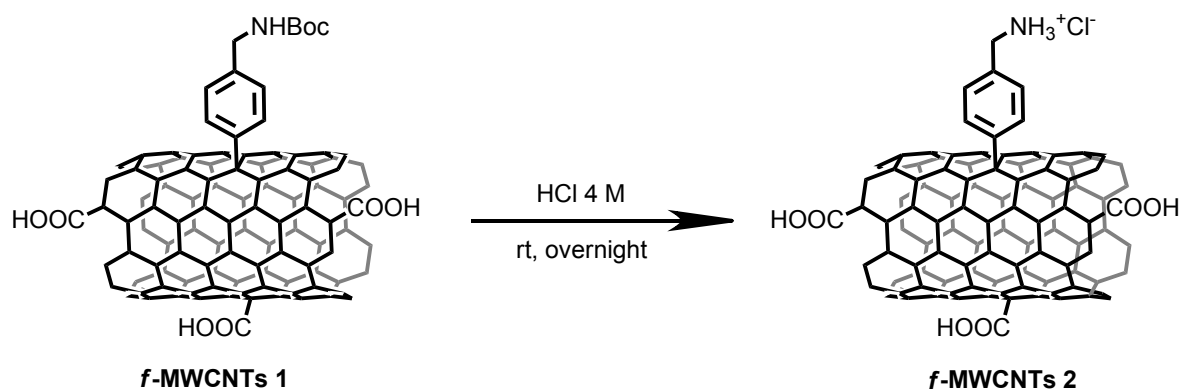

The *f*-MWCNTs **1** (20 mg) were dispersed in a 4 M HCl solution (20 mL) by sonication and mixture was stirred at rt overnight. The nanotubes were filtered on a Teflon membrane (Millipore, JHWP, 0.45  $\mu\text{m}$ ) and washed by redispersion followed by filtration in distilled water, EtOH, finally rinsed with Et<sub>2</sub>O. The *f*-MWCNTs **2** were recovered from filter as black solid (15.1 mg). The TGA profile showed a weight loss of 8 %, which corresponds to a degree of functionalization of 202  $\mu\text{mol g}^{-1}$ . Free amino groups presented on sample were quantified by colorimetric assay Kaiser Test (KT) giving a functionalization of 160  $\mu\text{mol}$  of free amino groups per gram of sample.

### Synthesis of *f*-MWCNTs 3

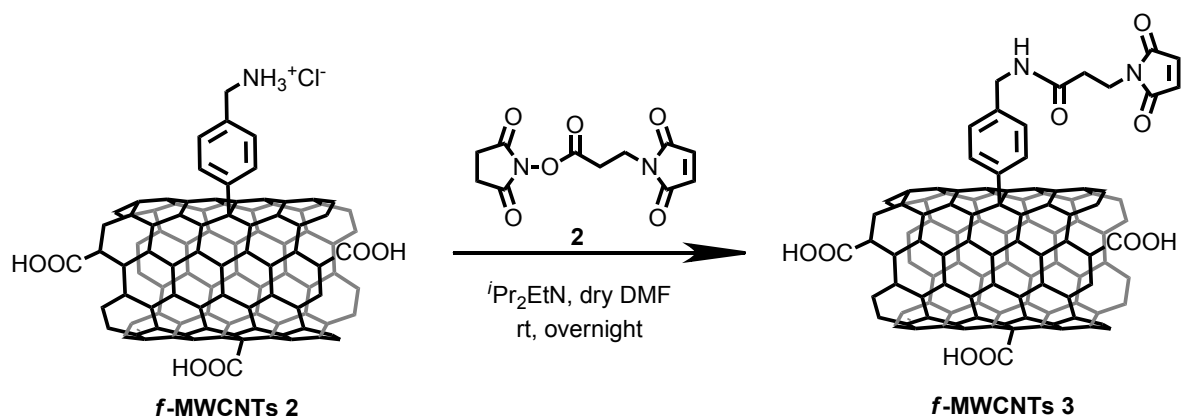

The *f*-MWCNTs **2** (13 mg) and N-succinimidyl 3-maleimidopropionate (138 mg, 520  $\mu\text{mol}$ ) were dissolved in dry DMF (13 mL). Then, *N,N*-isopropylethylamine (90  $\mu\text{L}$ , 520  $\mu\text{mol}$ ) was added and reaction was stirred at rt overnight. The mixture was filtered on a teflonmembrane (Millipore, JHWP, 0.45  $\mu\text{m}$ ) and rinsed with DMF. Then, the solid was washed by redispersion and filtration in distilled water, DMF, EtOH and finally rinsed with  $\text{Et}_2\text{O}$ , affording the *f*-MWCNTs **3** as black solid (11.4 mg). The TGA profile showed a weight loss of 9.1 %, corresponding to a degree of functionalization of 154  $\mu\text{mol g}^{-1}$ .

## Synthesis of *f*-MWCNTs 4

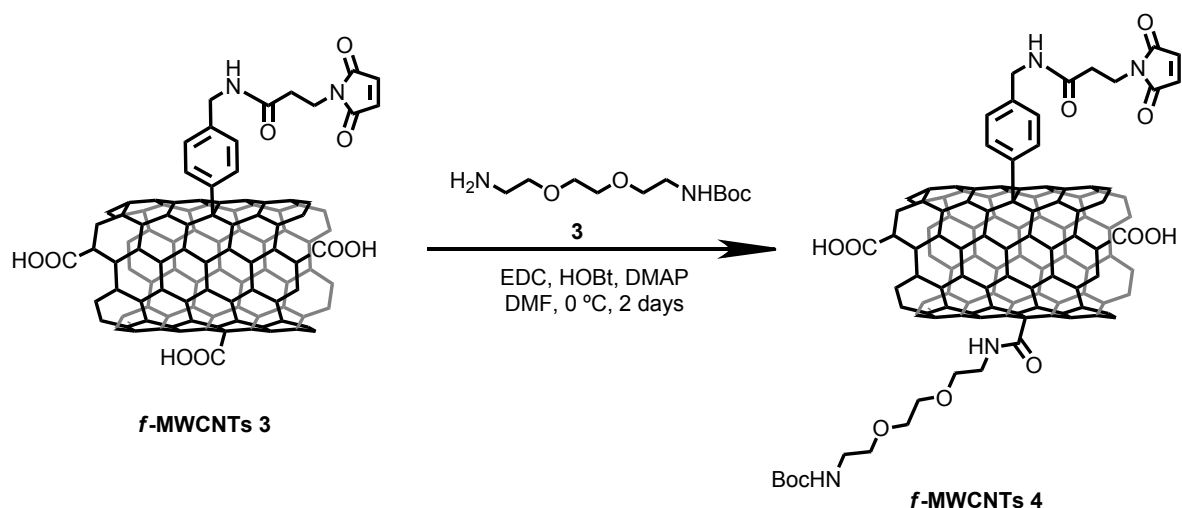

The *f*-MWCNTs **3** (9 mg) were dispersed in DMF (10 mL). *N*-Boc-2,2'-(ethylenedioxy)diethylamine (58 mg, 230  $\mu\text{mol}$ ), *N*-(3-Dimethylaminopropyl)-*N'*-ethylcarbodiimide hydrochloride, EDC (35.65 mg, 230  $\mu\text{mol}$ ), 1-Hydroxybenzotriazole hydrate (HOBT, 32 mg, 230  $\mu\text{mol}$ ) and 4-(Dimethylamino)pyridine, DMAP (28.06 mg, 23  $\mu\text{mol}$ ), were added at 0°C. The mixture was allowed to reach rt and it was stirred for 2 days. The mixture was filtered on a teflonmembrane (Millipore, JHWP, 0.45  $\mu\text{m}$ ) and it was washed by redispersion and filtration with distilled water, DMF and MeOH. Finally, the CNTs on the filter were rinsed with Et<sub>2</sub>O, affording of the *f*-MWCNTs **4** (8.3 mg). The TGA profile showed a neat of 6.9 %, corresponding to a degree of functionalization of 283  $\mu\text{mol g}^{-1}$ .

## Synthesis of *f*-MWCNTs **5**

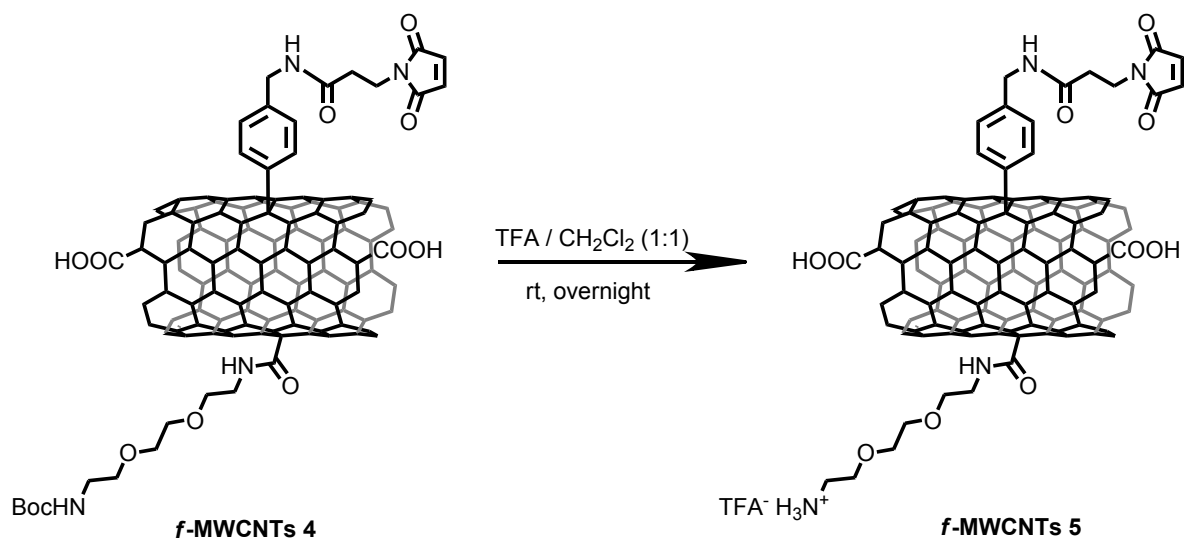

The *f*-MWCNTs **4** (7 mg) were dispersed in a mixture of TFA and CH<sub>2</sub>Cl<sub>2</sub> (7 mL, 1:1). Then, the suspension was stirred at rt overnight. The resulting suspension was filtered on a Teflon membrane (Millipore, JHWP, 0.45 μm) and washed by redispersion and filtration with MeOH and finally rinsed with Et<sub>2</sub>O. The *f*-MWCTs **5** were recovered as black solid (5.5 mg). The TGA profile showed a neat weight loss of 2.6 % from *f*-MWCTs **3**, corresponding to a degree of functionalization of 97 μmol g<sup>-1</sup> for *f*-MWCTs **5**. Kaiser test afforded 90 μmol g<sup>-1</sup> of free amino groups.

### Synthesis of *f*-MWCNT@mAb

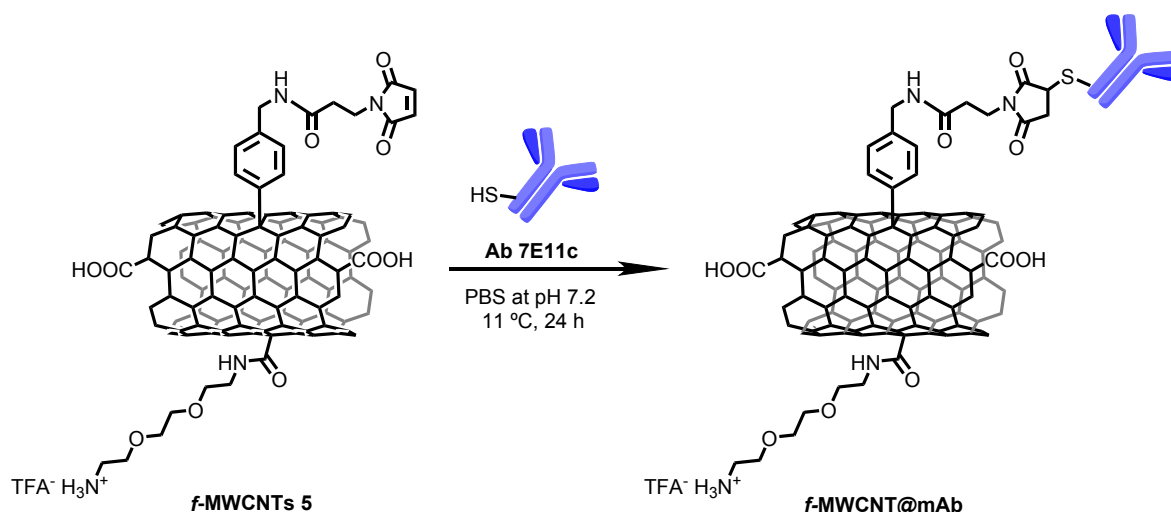

The *f*-MWCNTs **5** (3.23 mg) were added to a solution of Ab 7E11c in phosphate buffer saline, PBS (3 mL, 0.77 mg/mL, pH = 7.2), and was carefully sonicated for 10 min in an ice bath. The obtained suspension was gently shaken at 11 °C for 24 hours. The mixture was centrifuged at 2000 rpm for 4 min using a centrifuge tube with membrane (Vivaspin 20, 300000Da cut-off). Centrifugation was repeated 5 times with 15 mL of fresh PBS to remove free Ab. Remaining CNTs suspension was dialyzed in PBS using a dialysis sack (300000 Da cut-off).

A small fraction of the final suspension (1 mL) was centrifuged using a centrifugal filter device (Amicon Ultra, 50,000 cut-off membrane) and then centrifuged 5 times with Milli-Q water, in order to remove PBS salts before performing TGA. After centrifugation, the sample was freeze-dried. The TGA profile showed a neat weight loss of 45.7 % for **f-MWCNT@mAb**, corresponding to 3  $\mu\text{mol}$  of Ab 7E11c per gram of sample.



## Synthesis of Ab-Ru complex conjugate

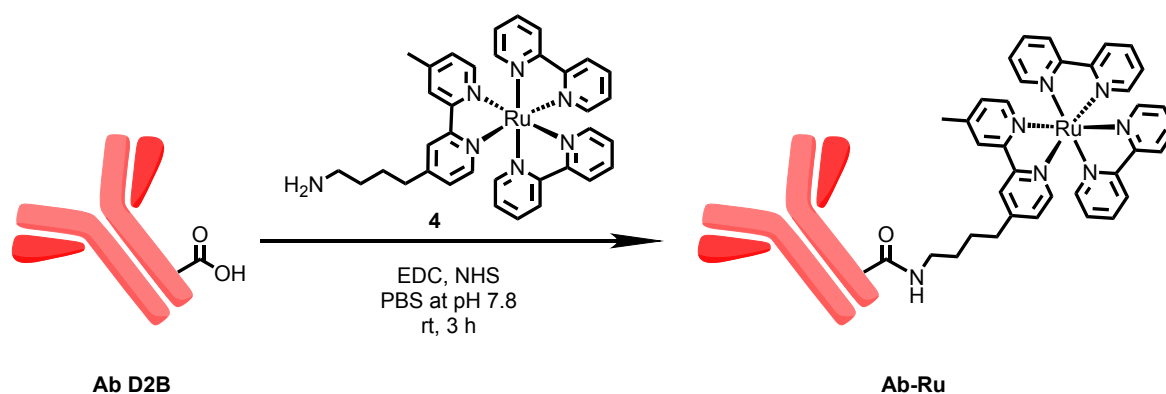

The coupling agent EDC (0.132 mg), N-Hydroxysuccinimide, NHS (0.1 mg), and bis(2,2'-bipyridine)-[4-(4'-methyl-2,2'-bipyridin-4-yl)-aminobutyl] ruthenium(II) complex (0.8 mg) were added to 1 mL of Ab D2B solution in PBS ( $1.5 \text{ mg mL}^{-1}$ ), after correcting pH to 7.8. The mixture was shaken for 3 hours at rt. The solution was diluted to 5 mL and then pH was exchanged to 7.4 by using dialysis (12,000 – 14,000 Da cut-off membrane) overnight at 4 °C. The solution was concentrated to 0.5 mL by centrifugation with centrifugal filter device (Amicon Ultra, 50,000 Da cut-off membrane). Then, it was centrifuged with fresh PBS to remove unreacted Ru complex. The washings were performed until filtrated solution did not show Ru complex by UV-Vis spectroscopy (450nm).

## TGA analysis

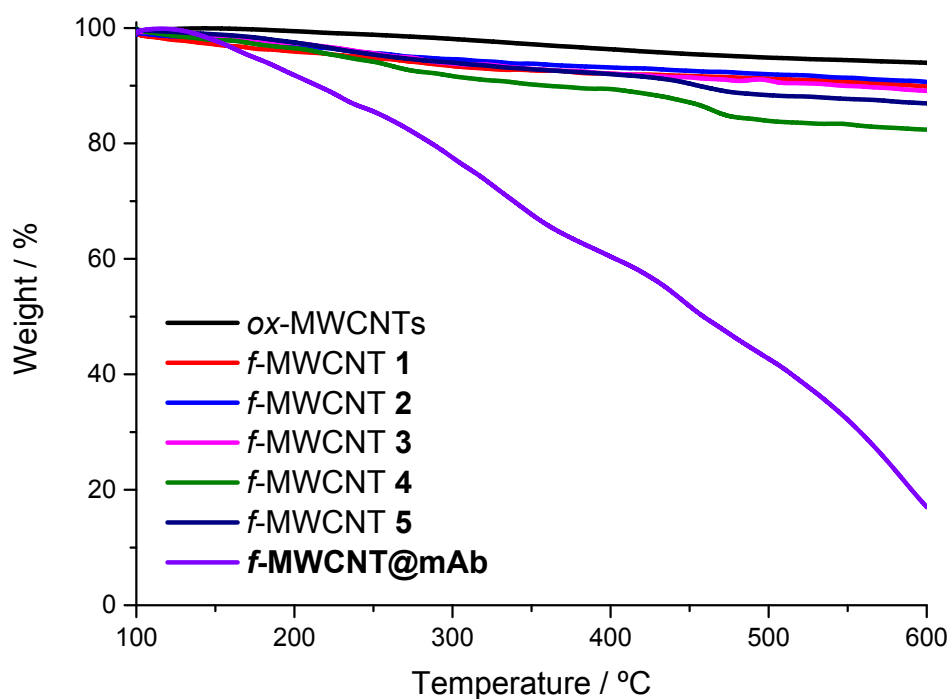

**Figure S1.** TGA profiles in N<sub>2</sub> atmosphere for *f*-MWCNTs.

**Table S1.** Average functional degree by TGA and Kaiser test.

| MWCNTs              | Funct. Degree TGA (μmol FG / g MCNTs) <sup>a)</sup> | Funct. Degree KT (μmol NH <sub>2</sub> / g MCNTs) |
|---------------------|-----------------------------------------------------|---------------------------------------------------|
| ox-MWCNTs           | 1142                                                |                                                   |
| <i>f</i> -MWCNTs 1  | 176                                                 |                                                   |
| <i>f</i> -MWCNTs 2  | 202                                                 | 160                                               |
| <i>f</i> -MWCNTs 3  | 154                                                 |                                                   |
| <i>f</i> -MWCNTs 4  | 283                                                 |                                                   |
| <i>f</i> -MWCNTs 5  | 97                                                  | 90                                                |
| <i>f</i> -MWCNT@mAb | 3                                                   |                                                   |

<sup>a)</sup> TGA-determined weight loss at 500 °C.

In order to draw quantitative information from thermogravimetric plots, we performed the following calculation to obtain *X* (functionalization degree):

$$X (\mu\text{mol} \cdot \text{g}^{-1}) = \frac{L(\%) \cdot 10^4}{M_w (\text{g} \cdot \text{mol}^{-1})} \quad \text{Equation S1}$$

Where  $L$  corresponds to the weight loss observed at 500°C (in %), after having subtracted the analogous loss from the pristine material. In sequential functionalization steps:

- For the first step,  $L$  stands as described above.
- For the second step,  $L$  refers to the difference between first and second functionalization.

The molecular weight ( $M_w$ ) is set for the expected desorbed moiety.

The conversion factor ( $10^4$ ) provides data in the desired unities ( $\mu\text{mol}\cdot\text{g}^{-1}$ ).

## TEM characterization

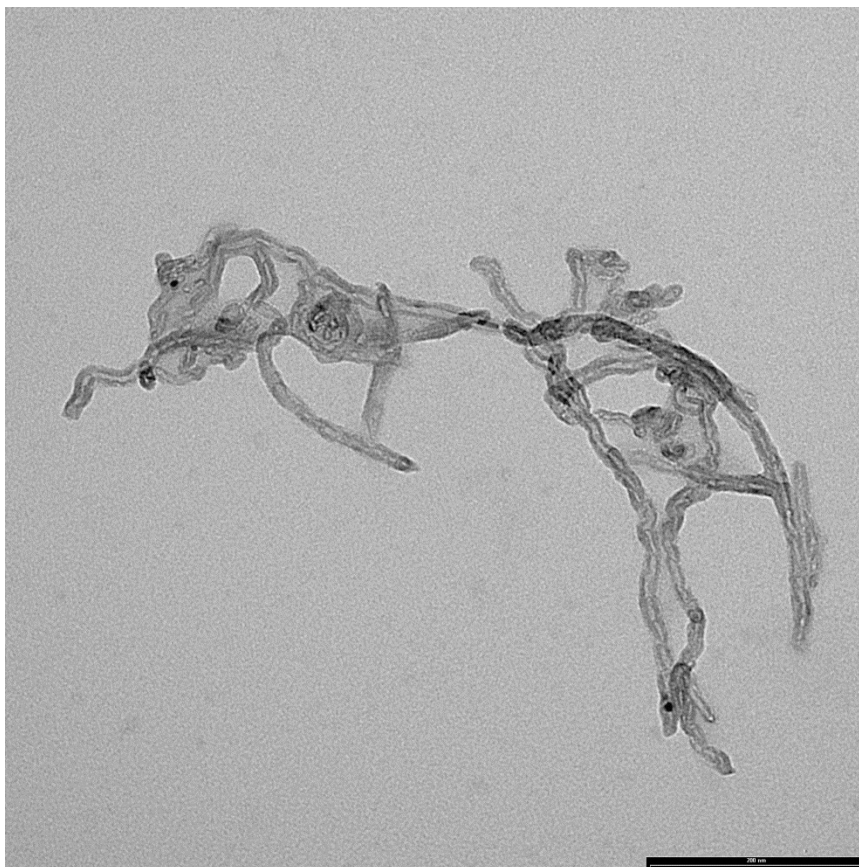

**Figure S2.** TEM image of *ox*MWCNTs.

## SEM characterization

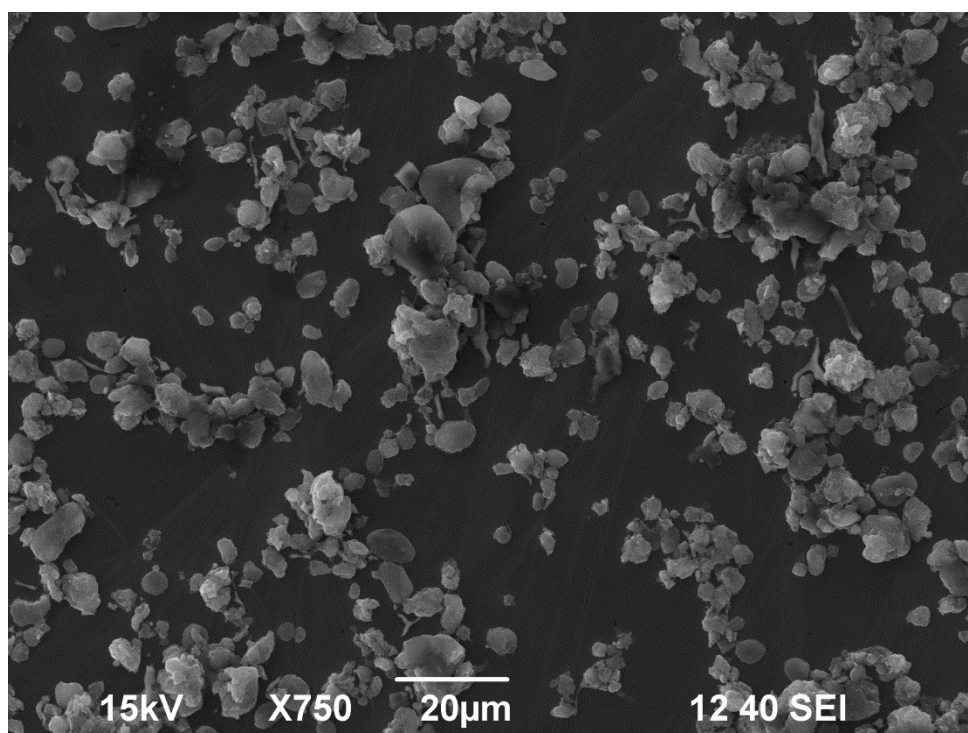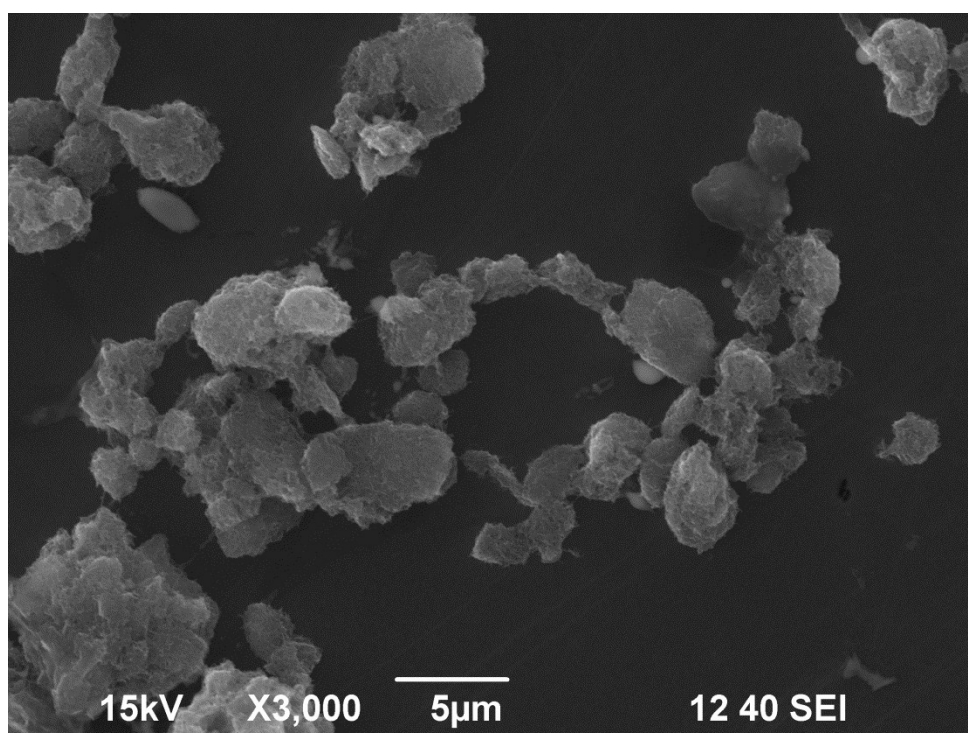

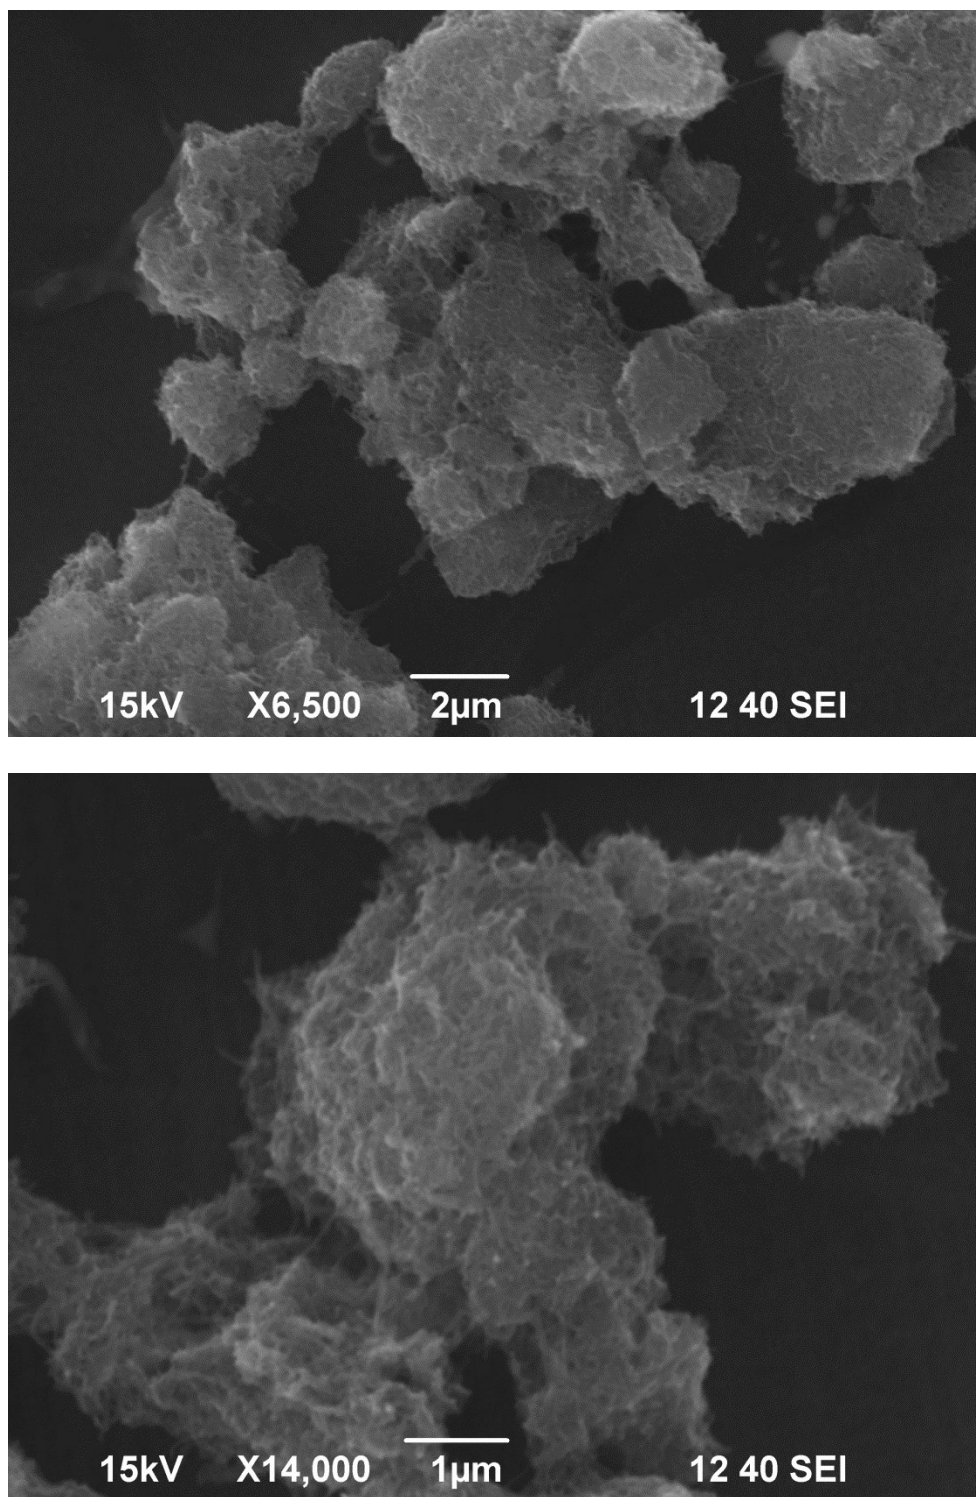

**Figure S3.** SEM images of ITO electrode modified with *f*-MWCNTs.

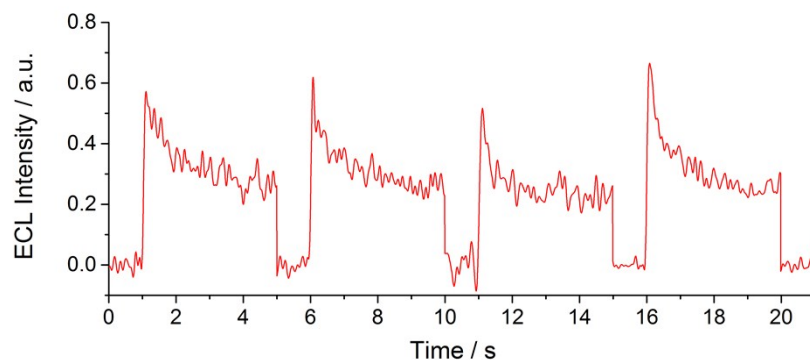

**Figure S4.** ECL intensity (red trace) vs time from 200 mM TPrA in PBS. Step potential  $E_1 = 0$  V,  $t_1 = 1$  s;  $E_2 = 1.70$  V,  $t_2 = 4$  s. PMT bias 750 mV. The **f-MWCNT@mAb** was incubated with lysate solution containing  $4.508 \text{ ng mL}^{-1}$  of PSMA antigen for 2h.

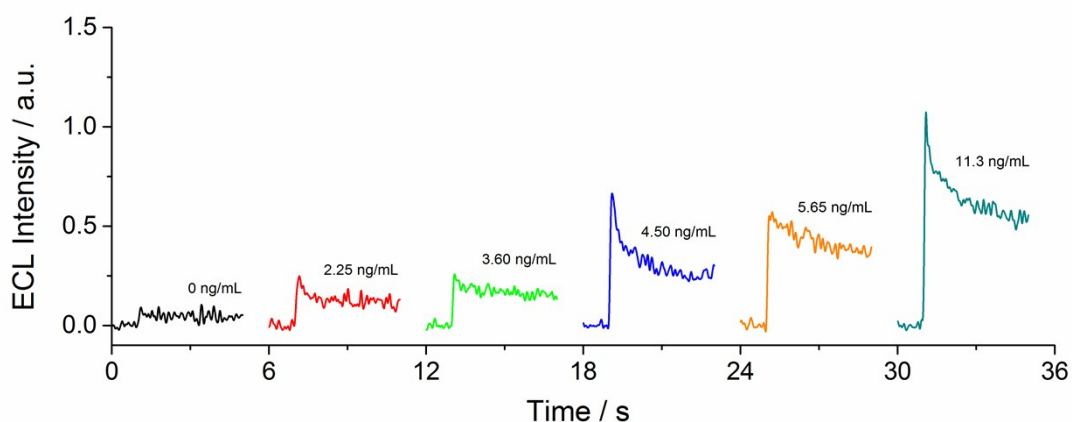

**Figure S5.** ECL intensity for different PSMA concentrations (11.3, 5.65, 4.50, 3.60, 2.25, 0  $\text{ng mL}^{-1}$ ) in the presence of 200 mM of TPA in 0.2M PBS. **f-MWCNT@mAb** based immunoassay at 1.70 V. Electrochemiluminescence experimental conditions: PMT bias 750 V.
